# Supplementary material
Source: HighWire-hosted journal article supplement (https://qualitysafety.bmj.com/content/31/5/353)
Supplement: inline-supplementary-material-6 [file inline-supplementary-material-6.pdf]

| CFIR Domain                       | Short Term Objectives                                                                                                                                                                   | Intermediate Objectives                                                                                           | Long Term Objectives                                                                                                              |
|-----------------------------------|-----------------------------------------------------------------------------------------------------------------------------------------------------------------------------------------|-------------------------------------------------------------------------------------------------------------------|-----------------------------------------------------------------------------------------------------------------------------------|
| 1. Characteristics of Individuals | <ul style="list-style-type: none"> <li>• Improve knowledge of patient safety through education and awareness campaigns</li> </ul>                                                       |                                                                                                                   | <ul style="list-style-type: none"> <li>• Integrate patient safety curricula into educational and clinical settings</li> </ul>     |
| 2. Inner Setting                  | <ul style="list-style-type: none"> <li>• Build strong safety cultures through assessment and debriefing</li> <li>• Integrate patient safety measures into existing workflows</li> </ul> |                                                                                                                   | <ul style="list-style-type: none"> <li>• Monitor and track patient safety metrics at institutional and national levels</li> </ul> |
| 3. Outer Setting                  |                                                                                                                                                                                         | <ul style="list-style-type: none"> <li>• Increase institutional and national leadership and governance</li> </ul> | <ul style="list-style-type: none"> <li>• Allocate financial support and incentives</li> </ul>                                     |
| 4. Intervention Characteristics   |                                                                                                                                                                                         | <ul style="list-style-type: none"> <li>• Assess high impact components of patient safety programs</li> </ul>      | <ul style="list-style-type: none"> <li>• Test program effectiveness on patient outcomes and process measures</li> </ul>           |
| 5. Process                        | <ul style="list-style-type: none"> <li>• Prioritization of implementation by opinion leaders</li> </ul>                                                                                 | <ul style="list-style-type: none"> <li>• Train local champions to increase engagement</li> </ul>                  | <ul style="list-style-type: none"> <li>• Assess execution fidelity and integrate modifications</li> </ul>                         |
